# Supplementary material for: Noble gas mass-spectrometry for extraterrestrial micro-samples: analyses of asteroid matter returned by Hayabusa2 JAXA mission
Source: Royal Society of Chemistry journal article supplement (doi:10.1039/d3ja00125c), 2023-01-01
Supplement: d3ja00125c1.pdf [file d3ja00125c1.pdf]

## Supporting Information for

**“Noble gas mass-spectrometry for extraterrestrial micro-samples: analyses of asteroid matter returned by Hayabusa2 JAXA mission”** by Alex Meshik<sup>a</sup>, Olga Pravdivtseva<sup>a</sup>, Ryuji Okazaki<sup>b</sup>, Kasumi Yogata<sup>c</sup>, Toru Yada<sup>c</sup>, Fumio Kitajima<sup>b</sup>, Hisayoshi Yurimoto<sup>d</sup>, Tomoki Nakamura<sup>e</sup>, Takaaki Noguchi<sup>f</sup>, Hikaru Yabuta<sup>g</sup>, Hiroshi Naraoka<sup>b</sup>, Kanako Sakamoto<sup>c</sup>, Shogo Tachibana<sup>ch</sup>, Masahiro Nishimura<sup>c</sup>, Aiko Nakato<sup>c</sup>, Akiko Miyazaki<sup>c</sup>, Masanao Abe<sup>c</sup>, Tatsuaki Okada<sup>c</sup>, Tomohiro Usui<sup>c</sup>, Makoto Yoshikawa<sup>c</sup>, Takanao Sakai<sup>c</sup>, Satoshi Tanaka<sup>c</sup>, Fuyuto Terui<sup>i</sup>, Satoru Nakazawa<sup>c</sup>, Seiichiro Watanabe<sup>j</sup>, Yuichi Tsuda<sup>c</sup> and Hayabusa2 Initial Analysis Volatile Team

<sup>a</sup> Physics Department, Washington University, Saint Louis, MO, 63130, USA.

<sup>b</sup> Department of Earth and Planetary Sciences, Kyushu University, Fukuoka, 819-0395, Japan.

<sup>c</sup> Institute of Space and Astronautical Science, Japan Aerospace Exploration Agency (JAXA), Sagamihara, 252-5210, Japan.

<sup>d</sup> Department of Earth and Planetary Sciences, Hokkaido University, Sapporo, 060-0810, Japan.

<sup>e</sup> Department of Earth Science, Tohoku University, Sendai, 980-8578, Japan.

<sup>f</sup> Division of Earth and Planetary Sciences, Kyoto University, Kyoto, 606-8502, Japan.

<sup>g</sup> Department of Earth and Planetary Systems Science, Hiroshima University, Higashi-Hiroshima, 739-8526, Japan.

<sup>h</sup> UTokyo Organization for Planetary and Space Science, The University of Tokyo, Tokyo, 113-0033, Japan.

<sup>i</sup> Kanagawa Institute of Technology, Atsugi 243-0292, Japan.

<sup>j</sup> Department of Earth and Environmental Sciences, Nagoya University, Nagoya, 464-8601, Japan.

### Table of Contents

|                                                                                       |   |
|---------------------------------------------------------------------------------------|---|
| Fig. S1 Typical peak shape of the mass spectrometer with > 95% ion transmission ..... | 1 |
| Fig. S2 Temporal variations of absolute sensitivity .....                             | 1 |
| Data Tables with reference noble gas compositions .....                               | 2 |
| References.....                                                                       | 8 |

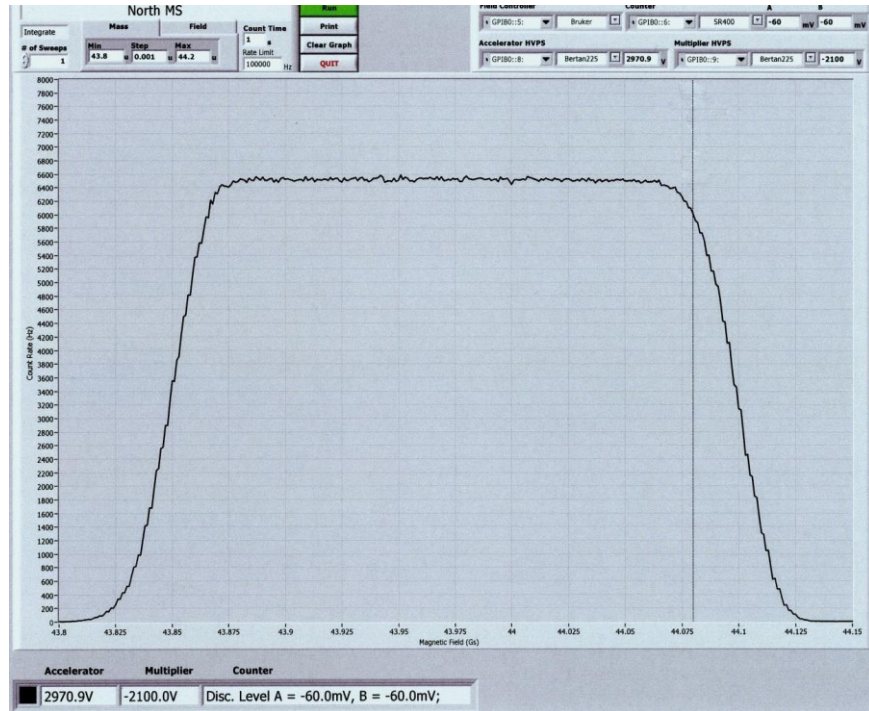

**Fig. S1** Typical peak shape of the mass spectrometer with >95% ion transmission. Flat top of the peak ( $m/e = 44$ , count rate  $\sim 6500$  counts/s) indicates that all ions pass through the detector slit.

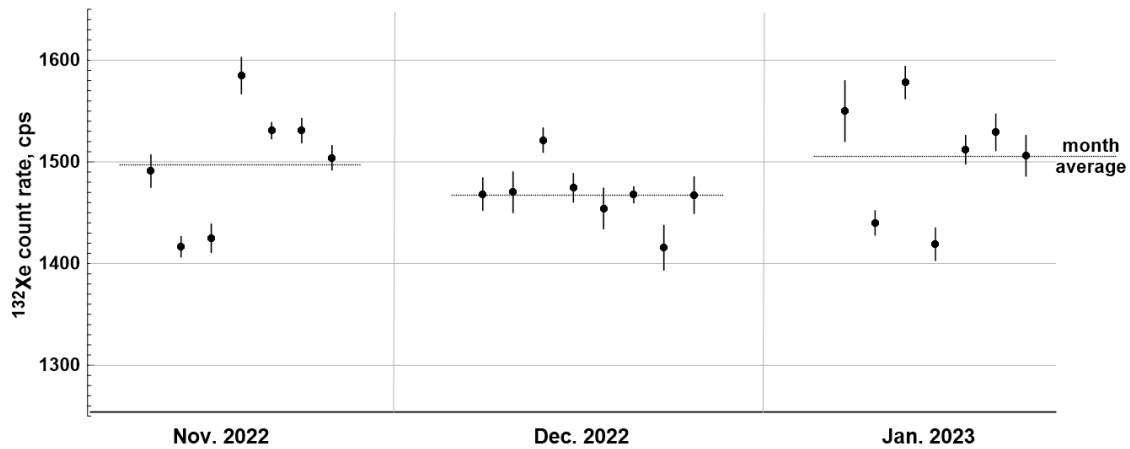

**Fig. S2** Temporal variations of the ion count rate corresponding to standard amount of xenon admitted to the mass spectrometer. Absolute sensitivity variations do not exceed  $\pm 7\%$ .

**C0106-05 (82 µg)**

| T, °C | <sup>4</sup> He, E-04<br>cc/g | <sup>3</sup> He/ <sup>4</sup> He × E-04 | ± (1σ) |
|-------|-------------------------------|-----------------------------------------|--------|
| 340   | 0.0010                        | n.d.                                    | n.d.   |
| 530   | 0.0997                        | 7.20                                    | 3.80   |
| 870   | 0.9659                        | 5.38                                    | 0.86   |
| 1260  | 0.8845                        | 2.30                                    | 1.17   |
| 1500  | 0.0178                        | n.d.                                    | n.d.   |
| 1610  | 0.0012                        | n.d.                                    | n.d.   |
| 1770  | 0.0016                        | n.d.                                    | n.d.   |
| Total | 1.9717                        | 4.39                                    | 0.68   |

**A0105-04 (173 µg)**

| T, °C | <sup>4</sup> He, E-04<br>cc/g | <sup>3</sup> He/ <sup>4</sup> He × E-04 | ± (1σ) |
|-------|-------------------------------|-----------------------------------------|--------|
| 340   | 0.0009                        | n.d.                                    | n.d.   |
| 530   | 0.0658                        | 5.40                                    | 2.82   |
| 700   | 0.2308                        | 5.90                                    | 0.47   |
| 870   | 0.4285                        | 4.10                                    | 0.33   |
| 1000  | 0.3780                        | 3.60                                    | 0.48   |
| 1130  | 0.0278                        | 3.90                                    | 3.30   |
| 1260  | 0.0150                        | n.d.                                    | n.d.   |
| 1400  | 0.0085                        | n.d.                                    | n.d.   |
| 1500  | 0.0056                        | n.d.                                    | n.d.   |
| 1610  | 0.0005                        | n.d.                                    | n.d.   |
| 1770  | 0.0006                        | n.d.                                    | n.d.   |
| Total | 1.1614                        | 4.44                                    | 0.23   |

(n .d. – not determined)

**Reference compositions**

| Component (ref.)      | <sup>3</sup> He/ <sup>4</sup> He × E-04 | ± (1σ)  |
|-----------------------|-----------------------------------------|---------|
| Q (S1)                | 1.23                                    | 0.02    |
| HL (S2)               | <1.70                                   | 2.82    |
| SW (S3)               | 4.64                                    | 0.009   |
| Earth Atmosphere (S4) | 0.01382                                 | 0.00005 |

**C0106-05 (82 µg)**

| T, °C | <sup>20</sup> Ne E-6 cc/g | <sup>21</sup> Ne/ <sup>22</sup> Ne | ± (1σ) | <sup>20</sup> Ne/ <sup>22</sup> Ne | ± (1σ) |
|-------|---------------------------|------------------------------------|--------|------------------------------------|--------|
| 340   | 0.0003                    | 0.0104                             | 0.0758 | 5.02                               | 3.18   |
| 530   | 0.0394                    | 0.1211                             | 0.0892 | 7.57                               | 8.35   |
| 870   | 0.6470                    | 0.0902                             | 0.0029 | 12.95                              | 0.26   |
| 1260  | 0.3587                    | 0.0690                             | 0.0029 | 9.99                               | 0.33   |
| 1500  | 0.0205                    | 0.0632                             | 0.0396 | 7.74                               | 7.63   |
| 1610  | 0.0081                    | 0.0133                             | 0.0227 | 8.07                               | 7.16   |
| 1770  | 0.0263                    | 0.1759                             | 0.1480 | 8.77                               | 4.84   |
| Total | 1.1003                    | 0.0832                             | 0.0040 | 12.03                              | 0.60   |

**A0105-04 (173 µg)**

| T, °C | <sup>20</sup> Ne E-6 cc/g | <sup>21</sup> Ne/ <sup>22</sup> Ne | ± (1σ) | <sup>20</sup> Ne/ <sup>22</sup> Ne | ± (1σ) |
|-------|---------------------------|------------------------------------|--------|------------------------------------|--------|
| 340   | 0.004                     | 0.0160                             | 0.0123 | 7.66                               | 4.79   |
| 530   | 0.035                     | 0.1625                             | 0.0218 | 11.70                              | 1.04   |
| 700   | 0.184                     | 0.1546                             | 0.0043 | 12.14                              | 0.26   |
| 870   | 0.250                     | 0.1039                             | 0.0020 | 11.12                              | 0.16   |
| 1000  | 0.122                     | 0.0897                             | 0.0026 | 10.26                              | 0.25   |
| 1130  | 0.027                     | 0.1108                             | 0.0083 | 10.33                              | 0.72   |
| 1260  | 0.018                     | 0.0300                             | 0.0052 | 8.22                               | 1.27   |
| 1400  | 0.014                     | 0.0175                             | 0.0082 | 10.79                              | 2.67   |
| 1500  | 0.014                     | 0.0348                             | 0.0127 | 10.95                              | 2.72   |
| 1610  | 0.006                     | 0.0264                             | 0.0091 | 6.23                               | 1.85   |
| 1770  | 0.014                     | 0.0355                             | 0.0077 | 10.21                              | 2.45   |
| Total | 0.687                     | 0.0107                             | 0.0002 | 10.96                              | 1.67   |

**Reference Ne compositions**

| Component (ref.)       | <sup>21</sup> Ne/ <sup>22</sup> Ne | ± (1σ)  | <sup>20</sup> Ne/ <sup>22</sup> Ne | ± (1σ) |
|------------------------|------------------------------------|---------|------------------------------------|--------|
| Q (S1)                 | 0.0294                             | 0.0010  | 10.67                              | 0.02   |
| HL (S2)                | 0.1625                             | 0.0218  | 8.500                              | 0.057  |
| G (S5)                 | < 0.0015                           |         | < 0.1                              |        |
| SW (S6)                | 0.03361                            | 0.00018 | 13.972                             | 0.025  |
| Earth atmosphere (S7)  | 0.0290                             | 0.0003  | 9.80                               | 0.08   |
| GCR in chondrites (S8) | 0.8 – 0.95                         |         | 0.7 – 0.93                         |        |

**C0106-05 (82 µg)**

| T, °C | <sup>36</sup> Ar, E-6 cc/g | <sup>36</sup> Ar/ <sup>40</sup> Ar | ± (1σ)  | <sup>38</sup> Ar/ <sup>40</sup> Ar | ± (1σ)  |
|-------|----------------------------|------------------------------------|---------|------------------------------------|---------|
| 340   | 0.032                      | 0.00360                            | 0.00005 | 0.00068                            | 0.00002 |
| 530   | 0.126                      | 0.00452                            | 0.00002 | 0.00086                            | 0.00001 |
| 870   | 0.310                      | 0.01789                            | 0.00010 | 0.00333                            | 0.00004 |
| 1260  | 0.939                      | 0.10417                            | 0.00434 | 0.01917                            | 0.00081 |
| 1500  | 0.505                      | 0.05814                            | 0.00203 | 0.01072                            | 0.00038 |
| 1610  | 0.056                      | 0.00377                            | 0.00004 | 0.00071                            | 0.00002 |
| 1770  | 0.058                      | 0.00365                            | 0.00003 | 0.00069                            | 0.00001 |
| Total | 2.025                      | 0.01976                            | 0.00053 | 0.00366                            | 0.00010 |

**A0105-04 (173 µg)**

| T, °C | <sup>36</sup> Ar, E-6 cc/g | <sup>36</sup> Ar/ <sup>40</sup> Ar | ± (1σ)  | <sup>38</sup> Ar/ <sup>40</sup> Ar | ± (1σ)  |
|-------|----------------------------|------------------------------------|---------|------------------------------------|---------|
| 340   | 0.019                      | 0.00367                            | 0.00002 | 0.00069                            | 0.00001 |
| 530   | 0.039                      | 0.00471                            | 0.00001 | 0.00086                            | 0.00001 |
| 700   | 0.105                      | 0.02347                            | 0.00011 | 0.00431                            | 0.00005 |
| 870   | 0.345                      | 0.06024                            | 0.00036 | 0.01117                            | 0.00010 |
| 1000  | 0.398                      | 0.06410                            | 0.00041 | 0.01176                            | 0.00010 |
| 1130  | 0.176                      | 0.03891                            | 0.00015 | 0.00714                            | 0.00006 |
| 1260  | 0.209                      | 0.04785                            | 0.00023 | 0.00874                            | 0.00007 |
| 1400  | 0.212                      | 0.05618                            | 0.00032 | 0.01028                            | 0.00009 |
| 1500  | 0.100                      | 0.06289                            | 0.00040 | 0.01149                            | 0.00011 |
| 1610  | 0.026                      | 0.00419                            | 0.00002 | 0.00079                            | 0.00001 |
| 1770  | 0.007                      | 0.00384                            | 0.00009 | 0.00074                            | 0.00002 |
| Total | 1.637                      | 0.03137                            | 0.00009 | 0.00577                            | 0.00002 |

**Reference compositions**

| Component (ref.)      | <sup>36</sup> Ar/ <sup>38</sup> Ar | ± (1σ) | <sup>40</sup> Ar/ <sup>36</sup> Ar | ± (1σ) |
|-----------------------|------------------------------------|--------|------------------------------------|--------|
| Q (S1)                | 5.34                               | 0.02   |                                    |        |
| HL (S2)               | 4.41                               | 0.06   |                                    |        |
| SW (S6)               | 5.501                              | 0.005  | 16.6                               | 0.1    |
| Cosmogenic (S8)       | 0.60 – 0.665                       |        |                                    |        |
| Earth atmosphere (S9) | 5.305                              | 0.008  | 298.56                             | 0.31   |

**C0106-05 (82 µg)**

| T, °C | <sup>84</sup> Kr, E-08 cc/g | <sup>78</sup> Kr | ± (1σ) | <sup>80</sup> Kr | ± (1σ) | <sup>82</sup> Kr | ± (1σ) | <sup>83</sup> Kr | ±1σ   | <sup>86</sup> Kr | ± (1σ) |
|-------|-----------------------------|------------------|--------|------------------|--------|------------------|--------|------------------|-------|------------------|--------|
| 340   | 0.08                        | 0.0070           | 0.0025 | 0.0465           | 0.0023 | 0.198            | 0.011  | 0.206            | 0.002 | 0.3050           | 0.0077 |
| 530   | 0.90                        | 0.0087           | 0.0006 | 0.0415           | 0.0012 | 0.205            | 0.004  | 0.201            | 0.002 | 0.3035           | 0.0023 |
| 870   | 0.37                        | 0.0091           | 0.0004 | 0.0410           | 0.0009 | 0.204            | 0.001  | 0.200            | 0.002 | 0.2983           | 0.0057 |
| 1260  | 1.11                        | 0.0081           | 0.0002 | 0.0391           | 0.0005 | 0.201            | 0.001  | 0.201            | 0.001 | 0.3123           | 0.0021 |
| 1500  | 0.58                        | 0.0088           | 0.0005 | 0.0384           | 0.0017 | 0.203            | 0.002  | 0.202            | 0.003 | 0.3121           | 0.0029 |
| 1610  | 0.07                        | 0.0124           | 0.0026 | 0.0349           | 0.0044 | 0.205            | 0.007  | 0.206            | 0.007 | 0.3071           | 0.0087 |
| 1770  | 0.06                        | 0.0104           | 0.0021 | 0.0324           | 0.0062 | 0.195            | 0.005  | 0.197            | 0.005 | 0.3082           | 0.0063 |
| Total | 3.17                        | 0.0086           | 0.0003 | 0.0398           | 0.0005 | 0.203            | 0.001  | 0.201            | 0.001 | 0.3077           | 0.0013 |

**A0105-04 (173 µg)**

|       |      |        |        |        |        |        |        |        |        |        |        |
|-------|------|--------|--------|--------|--------|--------|--------|--------|--------|--------|--------|
| 340   | 0.13 | 0.0132 | 0.0012 | 0.0396 | 0.0033 | 0.207  | 0.003  | 0.206  | 0.004  | 0.3046 | 0.0090 |
| 530   | 0.37 | 0.0086 | 0.0007 | 0.0387 | 0.0017 | 0.201  | 0.004  | 0.198  | 0.004  | 0.3028 | 0.0061 |
| 700   | 0.14 | 0.0139 | 0.0005 | 0.0409 | 0.0011 | 0.202  | 0.002  | 0.204  | 0.002  | 0.3047 | 0.0044 |
| 870   | 0.29 | 0.0089 | 0.0007 | 0.0395 | 0.0011 | 0.206  | 0.004  | 0.205  | 0.002  | 0.3065 | 0.0025 |
| 1000  | 0.36 | 0.0092 | 0.0003 | 0.0398 | 0.0015 | 0.207  | 0.004  | 0.204  | 0.002  | 0.3119 | 0.0017 |
| 1130  | 0.24 | 0.0111 | 0.0008 | 0.0395 | 0.0019 | 0.202  | 0.005  | 0.201  | 0.003  | 0.3082 | 0.0073 |
| 1260  | 0.18 | 0.0101 | 0.0010 | 0.0390 | 0.0015 | 0.199  | 0.002  | 0.202  | 0.003  | 0.3114 | 0.0023 |
| 1400  | 0.26 | 0.0097 | 0.0006 | 0.0419 | 0.0087 | 0.204  | 0.006  | 0.202  | 0.005  | 0.3071 | 0.0033 |
| 1500  | 0.22 | 0.0107 | 0.0007 | 0.0418 | 0.0010 | 0.204  | 0.006  | 0.200  | 0.001  | 0.3087 | 0.0027 |
| 1610  | 0.02 | 0.0104 | 0.0031 | 0.0423 | 0.0068 | 0.200  | 0.011  | 0.203  | 0.002  | 0.3100 | 0.0097 |
| 1770  | 0.03 | 0.0155 | 0.0027 | 0.0414 | 0.0025 | 0.204  | 0.007  | 0.202  | 0.006  | 0.3056 | 0.0084 |
| Total | 2.24 | 0.0102 | 0.0002 | 0.0400 | 0.0005 | 0.2036 | 0.0001 | 0.2024 | 0.0010 | 0.3074 | 0.0016 |

**Reference compositions**

| Component (reference)           | <sup>78</sup> Kr | ± (1σ)  | <sup>80</sup> Kr | ± (1σ)   | <sup>82</sup> Kr | ± (1σ)  | <sup>83</sup> Kr | ± (1σ)  | <sup>86</sup> Kr | ± (1σ)  |
|---------------------------------|------------------|---------|------------------|----------|------------------|---------|------------------|---------|------------------|---------|
| Q (S1)                          | 0.00603          | 0.00003 | 0.03937          | 0.00007  | 0.2018           | 0.0002  | 0.2018           | 0.0002  | 0.3095           | 0.0005  |
| HL (S2)                         | 0.0042           | 0.0010  | 0.0305           | 0.0010   | 0.1590           |         | 0.1989           | 0.0010  | 0.3623           | 0.0018  |
| G (S5)                          |                  |         | 0.0133 – 0.0183  |          | 0.4167           |         | 0.1192 – 0.0054  |         | 0.454 – 1.176    |         |
| N (S5)                          |                  |         | 0.03962          | 0.00040  | 0.2028           | 0.0021  | 0.2018           | 0.0032  | 0.2842           | 0.0036  |
| SW (S6)                         | 0.00642          | 0.00005 | 0.0412           | 0.0002   | 0.2054           | 0.0002  | 0.2034           | 0.0002  | 0.3012           | 0.0004  |
| Earth atmosphere (S10)          | 0.006087         | 0.0020  | 0.039599         | 0.000020 | 0.20217          | 0.00004 | 0.20136          | 0.00021 | 0.30524          | 0.00025 |
| <sup>238</sup> U fission (S11)  |                  |         |                  |          |                  |         | 0.23             | 0.08    | 7.69             | 1.18    |
| <sup>244</sup> Pu fission (S11) |                  |         |                  |          |                  |         | 0.54             | 0.02    | 2.00             | 0.08    |

**C0106-05 (82 µg)**

| T, °C              | <sup>132</sup> Xe, 10 <sup>-8</sup> cc/g | <sup>124</sup> Xe | ± (1σ)         | <sup>126</sup> Xe | ± (1σ)         | <sup>128</sup> Xe | ± (1σ)        | <sup>129</sup> Xe | ± (1σ)       | <sup>130</sup> Xe | ± (1σ)        | <sup>131</sup> Xe | ± (1σ)       | <sup>134</sup> Xe | ± (1σ)        | <sup>136</sup> Xe | ± (1σ)        |
|--------------------|------------------------------------------|-------------------|----------------|-------------------|----------------|-------------------|---------------|-------------------|--------------|-------------------|---------------|-------------------|--------------|-------------------|---------------|-------------------|---------------|
| 340                | 0.063                                    | 0.00392           | 0.00051        | 0.00292           | 0.00052        | 0.0707            | 0.0062        | 0.976             | 0.018        | 0.1500            | 0.0052        | 0.782             | 0.018        | 0.3698            | 0.0194        | 0.3271            | 0.0065        |
| 530                | 0.983                                    | 0.00333           | 0.00016        | 0.00318           | 0.00019        | 0.0722            | 0.0009        | 1.029             | 0.004        | 0.1513            | 0.0014        | 0.792             | 0.003        | 0.3788            | 0.0045        | 0.3261            | 0.0027        |
| 870                | 0.310                                    | 0.00411           | 0.00033        | 0.00359           | 0.00021        | 0.0764            | 0.0020        | 1.039             | 0.009        | 0.1611            | 0.0020        | 0.815             | 0.006        | 0.3828            | 0.0047        | 0.3227            | 0.0023        |
| <b>1260</b>        | <b>0.969</b>                             | <b>0.00532</b>    | <b>0.00017</b> | <b>0.00375</b>    | <b>0.00018</b> | <b>0.0843</b>     | <b>0.0008</b> | <b>1.085</b>      | <b>0.004</b> | <b>0.1616</b>     | <b>0.0011</b> | <b>0.812</b>      | <b>0.004</b> | <b>0.3851</b>     | <b>0.0024</b> | <b>0.3219</b>     | <b>0.0026</b> |
| <b>1500</b>        | <b>0.790</b>                             | <b>0.00485</b>    | <b>0.00016</b> | <b>0.00442</b>    | <b>0.00024</b> | <b>0.0835</b>     | <b>0.0006</b> | <b>1.046</b>      | <b>0.005</b> | <b>0.1624</b>     | <b>0.0014</b> | <b>0.834</b>      | <b>0.004</b> | <b>0.3797</b>     | <b>0.0027</b> | <b>0.3182</b>     | <b>0.0024</b> |
| 1610               | 0.021                                    | 0.00461           | 0.00115        | 0.00372           | 0.00119        | 0.0757            | 0.0043        | 1.030             | 0.029        | 0.1656            | 0.0084        | 0.804             | 0.026        | 0.3912            | 0.0157        | 0.3353            | 0.0139        |
| 1770               | 0.014                                    | 0.00495           | 0.00101        | 0.00432           | 0.00139        | 0.0738            | 0.0067        | 1.025             | 0.036        | 0.1585            | 0.0112        | 0.823             | 0.024        | 0.3749            | 0.0149        | 0.3455            | 0.0212        |
| Total              | 3.150                                    | 0.00443           | 0.00009        | 0.00371           | 0.00010        | 0.0792            | 0.0005        | 1.050             | 0.002        | 0.1583            | 0.0007        | 0.811             | 0.002        | 0.3806            | 0.0018        | 0.3226            | 0.0013        |
| <b>1260+1500°C</b> | <b>1.759</b>                             | <b>0.00511</b>    | <b>0.00012</b> | <b>0.00405</b>    | <b>0.00015</b> | <b>0.0840</b>     | <b>0.0005</b> | <b>1.067</b>      | <b>0.003</b> | <b>0.1619</b>     | <b>0.0009</b> | <b>0.822</b>      | <b>0.003</b> | <b>0.3816</b>     | <b>0.0018</b> | <b>0.3202</b>     | <b>0.0018</b> |

**A0105-04 (173 µg)**

|                    |              |                |                |                |                |               |               |              |              |               |               |               |               |               |               |               |               |
|--------------------|--------------|----------------|----------------|----------------|----------------|---------------|---------------|--------------|--------------|---------------|---------------|---------------|---------------|---------------|---------------|---------------|---------------|
| 340                | 0.155        | 0.00310        | 0.00025        | 0.00343        | 0.00029        | 0.0688        | 0.0044        | 0.986        | 0.008        | 0.1494        | 0.0028        | 0.7925        | 0.0067        | 0.3862        | 0.0046        | 0.3243        | 0.0047        |
| 530                | 0.391        | 0.00388        | 0.00014        | 0.00317        | 0.00012        | 0.0730        | 0.0009        | 0.993        | 0.004        | 0.1507        | 0.0011        | 0.7900        | 0.0046        | 0.3862        | 0.0023        | 0.3272        | 0.0025        |
| 700                | 0.099        | 0.00395        | 0.00026        | 0.00370        | 0.00037        | 0.0755        | 0.0015        | 1.065        | 0.009        | 0.1536        | 0.0026        | 0.8061        | 0.0140        | 0.3857        | 0.0047        | 0.3287        | 0.0042        |
| 870                | 0.217        | 0.00419        | 0.00023        | 0.00392        | 0.00026        | 0.0777        | 0.0014        | 1.090        | 0.009        | 0.1597        | 0.0024        | 0.8223        | 0.0057        | 0.3865        | 0.0044        | 0.3282        | 0.0029        |
| <b>1000</b>        | <b>0.377</b> | <b>0.00529</b> | <b>0.00024</b> | <b>0.00417</b> | <b>0.00020</b> | <b>0.0835</b> | <b>0.0009</b> | <b>1.157</b> | <b>0.006</b> | <b>0.1596</b> | <b>0.0011</b> | <b>0.8237</b> | <b>0.0043</b> | <b>0.3837</b> | <b>0.0028</b> | <b>0.3253</b> | <b>0.0026</b> |
| <b>1130</b>        | <b>0.278</b> | <b>0.00452</b> | <b>0.00021</b> | <b>0.00420</b> | <b>0.00022</b> | <b>0.0848</b> | <b>0.0013</b> | <b>1.108</b> | <b>0.005</b> | <b>0.1630</b> | <b>0.0020</b> | <b>0.8195</b> | <b>0.0048</b> | <b>0.3770</b> | <b>0.0026</b> | <b>0.3131</b> | <b>0.0021</b> |
| <b>1260</b>        | <b>0.191</b> | <b>0.00491</b> | <b>0.00022</b> | <b>0.00402</b> | <b>0.00021</b> | <b>0.0844</b> | <b>0.0024</b> | <b>1.054</b> | <b>0.006</b> | <b>0.1633</b> | <b>0.0017</b> | <b>0.8289</b> | <b>0.0057</b> | <b>0.3828</b> | <b>0.0037</b> | <b>0.3168</b> | <b>0.0028</b> |
| <b>1400</b>        | <b>0.311</b> | <b>0.00468</b> | <b>0.00016</b> | <b>0.00432</b> | <b>0.00017</b> | <b>0.0824</b> | <b>0.0017</b> | <b>1.034</b> | <b>0.003</b> | <b>0.1659</b> | <b>0.0016</b> | <b>0.8184</b> | <b>0.0044</b> | <b>0.3809</b> | <b>0.0026</b> | <b>0.3196</b> | <b>0.0027</b> |
| <b>1500</b>        | <b>0.287</b> | <b>0.00513</b> | <b>0.00015</b> | <b>0.00414</b> | <b>0.00021</b> | <b>0.0805</b> | <b>0.0023</b> | <b>1.051</b> | <b>0.005</b> | <b>0.1654</b> | <b>0.0019</b> | <b>0.8128</b> | <b>0.0066</b> | <b>0.3775</b> | <b>0.0027</b> | <b>0.3180</b> | <b>0.0027</b> |
| 1610               | 0.006        | 0.00361        | 0.00121        | 0.00338        | 0.00083        | 0.0791        | 0.0143        | 1.083        | 0.031        | 0.1555        | 0.0066        | 0.8568        | 0.0348        | 0.3809        | 0.0262        | 0.3501        | 0.0187        |
| 1770               | 0.004        | 0.00354        | 0.00078        | 0.00403        | 0.00168        | 0.0834        | 0.0062        | 0.993        | 0.044        | 0.1522        | 0.0095        | 0.8576        | 0.0365        | 0.3682        | 0.0274        | 0.3444        | 0.0212        |
| Total              | 2.323        | 0.00452        | 0.00007        | 0.00401        | 0.00007        | 0.0791        | 0.0006        | 1.065        | 0.002        | 0.1600        | 0.0006        | 0.8131        | 0.0019        | 0.3827        | 0.0010        | 0.3216        | 0.0010        |
| <b>1000-1500°C</b> | <b>1.444</b> | <b>0.00493</b> | <b>0.00009</b> | <b>0.00418</b> | <b>0.00009</b> | <b>0.0830</b> | <b>0.0008</b> | <b>1.086</b> | <b>0.002</b> | <b>0.1633</b> | <b>0.0007</b> | <b>0.8203</b> | <b>0.0002</b> | <b>0.3818</b> | <b>0.0013</b> | <b>0.3191</b> | <b>0.0012</b> |

**Reference compositions**

| Component (reference)           | <sup>124</sup> Xe | ± (1σ)  | <sup>126</sup> Xe | ± (1σ)  | <sup>128</sup> Xe | ± (1σ) | <sup>129</sup> Xe | ± (1σ) | <sup>130</sup> Xe | ± (1σ) | <sup>131</sup> Xe | ± (1σ) | <sup>134</sup> Xe | ± (1σ) | <sup>136</sup> Xe | ± (1σ) |
|---------------------------------|-------------------|---------|-------------------|---------|-------------------|--------|-------------------|--------|-------------------|--------|-------------------|--------|-------------------|--------|-------------------|--------|
| Q (S1)                          | 0.00455           | 0.00002 | 0.00406           | 0.00002 | 0.0822            | 0.0002 | 1.042             | 0.002  | 0.1619            | 0.0003 | 0.8185            | 0.0009 | 0.3780            | 0.0011 | 0.3164            | 0.0008 |
| HL (S2)                         | 0.00839           | 0.00009 | 0.00534           | 0.00008 | 0.0905            | 0.0006 | 1.056             | 0.002  | 0.1542            | 0.0003 | 0.8457            | 0.0013 | 0.6356            | 0.0013 | ≅0.6991           |        |
| SW (S12)                        | 0.00395           | 0.00026 | 0.00370           | 0.00037 | 0.0755            | 0.0015 | 1.065             | 0.009  | 0.1536            | 0.0026 | 0.8061            | 0.0140 | 0.3857            | 0.0047 | 0.3287            | 0.0042 |
| G (S13)                         | ≅ 0               |         | ≅ 0               |         | 0.2159            | 0.0023 | 0.1182            | 0.0112 | 0.4826            | 0.0042 | 0.1858            | 0.0117 | 0.0222            | 0.0053 | ≅0.0034           |        |
| Earth atmosphere (S10)          | 0.3537            | 0.0011  | 0.3300            | 0.0017  | 7.136             | 0.009  | 0.9832            | 0.0012 | .15136            | .00012 | 0.7890            | 0.0011 | 0.3879            | 0.0006 | 0.3294            | 0.0004 |
| <sup>238</sup> U fission (S11)  | 0                 |         | 0                 |         | 0                 |        | <0.003            |        | 0                 |        | 0.128             | 0.005  | 1.398             | 0.020  | 1.681             | 0.048  |
| <sup>244</sup> Pu fission (S13) | 0                 |         | 0                 |         | 0                 |        | 0.054             | 0.062  | 0                 |        | 0.278             | 0.017  | 1.041             | 0.006  | 1.120             | 0.016  |

## References

- S1. H. Busemann, H. Baur and R. Wieler. Primordial noble gases in phase Q in carbonaceous and ordinary chondrites studied by closed-system stepped etching. *Meteorit. Planet. Sci.*, 2000, **35**, 949–973.
- S2. G. R. Huss and R. S. Lewis. Noble gases in presolar diamonds 1: three distinct components and their implications in diamond origins. *Meteorit. Planet. Sci.*, 1994, **29**, 791–810.
- S3. V. S. Heber, R. Wieler, H. Baur, Ch. Olinger, T. A. Friedmann and D. S. Burnett. Noble gas composition of the solar wind as collected by the Genesis mission. *Geochim. Cosmochim. Acta*, 2009, **73**, 7414–7432.
- S4. Y. Sano, B. Marty and P. Burnard. Noble gases in the atmosphere. In: *Burnard, P. (eds) The Noble Gases as Geochemical Tracers. Advances in Isotope Geochemistry*. 2013, Springer, Berlin, Heidelberg.
- S5. R. S. Lewis, S. Amari, E. Anders. Interstellar grains in meteorites: II. SiC and its noble gases. *Geochim. Cosmochim. Acta*, 1994, **58**, 471–494.
- S6. A. Meshik, J. Mabry, C. Hohenberg, Y. Marrocchi, O. Pravdivtseva, D. Burnett, Ch. Olinger, R. Wiens, D. Reisenfeld, J. Allton, K. McNamara, E. Stansbery and A. J. G. Jurewicz. Constraints on Neon and Argon Isotopic Fractionation in Solar Wind. *Science*, 2007, **318**, 433–435.
- S7. P. Eberhardt, O. Eugster and K. Marti. A redetermination of the isotopic composition of atmospheric Neon. *Zeitschrift für Naturforschung A: Journal of Physical Sciences*, 1965, **20a**, 623–624.
- S8. R. Wieler. Cosmic-Ray-Produced Noble Gases in Meteorites. In: *Reviews in Mineralogy and Geochemistry*, 2002, **47** (1), 125–170.
- S9. J. Y. Lee, K. Marti, J. P. Severinghaus, K. Kawamura, H-S. Yoo, J. B. Lee and J. S. Kim. A redetermination of the isotopic abundances of atmospheric Ar. *Geochim. Cosmochim. Acta*, 2006, **70**, 4507–4512.
- S10. J. R. Basford, J. C. Dragon, R. O. Pepin, M. R. Coscio and V. R. Murthy. *Krypton and Xenon in lunar fines. Proceedings of the 4th Lunar Science Conference*, 1973, 1915–1955.
- S11. 1. M. Ozima and F. A. Podosek, *Noble Gas Geochemistry*, Cambridge University Press, 2002, Cambridge, 2nd edn.
- S12. A. Meshik, O. Pravdivtseva and D. Burnett. Refined composition of Solar Wind xenon delivered by Genesis NASA mission: Comparison with xenon captured by extraterrestrial regolith soils. *Geochim. Cosmochim. Acta*, 2020, **276**, 289–298.
- S13. U. Ott. Planetary and pre-solar noble gases in meteorites. *Chemie der Erde – Geochemistry*, 2014, **74**, 519–544.
- S14. G. B. Hudson, B. M. Kennedy, F. A. Podosek and C. M. Hohenberg. The early solar system abundance of Pu-244 as inferred from the St. Severin chondrite. Lunar and Planetary Science Conference 19th, 1989, Proceedings (A89-36486 15-91). Cambridge/Houston, TX, Cambridge University Press/Lunar and Planetary Institute, 547–557.
